# Supplementary material for: Laboratory study of non-linear wave–wave interactions of extreme focused waves in the nearshore zone
Source: Copernicus journal article supplement (doi:10.5194/nhess-20-3279-2020), 2020-12-03
Supplement: Supplementary file 1 [file nhess-20-3279-2020-supplement.zip]

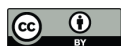

## *Supplement of*

# **Laboratory study of non-linear wave–wave interactions of extreme focused waves in the nearshore zone**

**Iskander Abroug et al.**

*Correspondence to:* Iskander Abroug ([iskander.abroug@unicaen.fr](mailto:iskander.abroug@unicaen.fr))

- [nhess-20-3279-2020-supplement-title-page.pdf](#)
- Data
  - Test 1.txt
  - Test 2.txt
  - Test 3.txt
  - Test 4.txt
  - Test 5.txt
  - Test 6.txt
  - Test 7.txt

The copyright of individual parts of the supplement might differ from the CC BY 4.0 License.
